# Supplementary material for: Water Kefir Grains—Microbial Biomass Source for Carbonaceous Materials Used as Sulfur-Host Cathode in Li-S Batteries
Source: MDPI journal article supplement (doi:10.3390/ma15248856), 2022-12-12
Supplement: s1 [file s1]

## Supporting Information

# Water Kefir Grains - Microbial Biomass Source for Carbonaceous Materials Used as Sulfur-host Cathode in Li-S Batteries

Ana L. Páez Jerez<sup>1</sup>, M. Fernanda Mori<sup>2</sup>, Victoria Flexer<sup>1</sup> and Alvaro Y. Tesio<sup>1\*</sup>

<sup>1</sup>CIDMEJu (CONICET-Universidad Nacional de Jujuy), Centro de Desarrollo Tecnológico General Savio, Av. Martijena S/N, Palpalá, Jujuy, 4612, Argentina

<sup>2</sup>Instituto de Investigaciones en Catálisis y Petroquímica, CONICET, Facultad de Ingeniería Química, Universidad Nacional del Litoral, Santiago del Estero 2829, S3000AOM Santa Fe, Argentina

\* Correspondence: atesio@cidmeju.unju.edu.ar

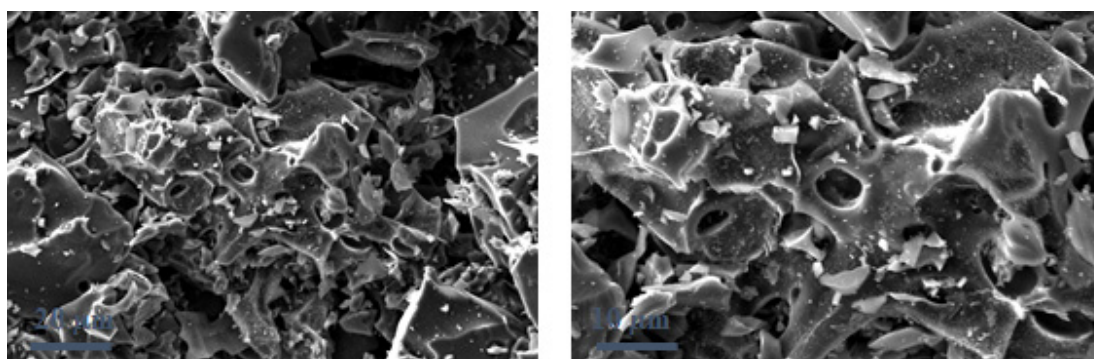

Figure S1. SEM images obtained for washed water kefir carbons measured at 20 and 10  $\mu\text{m}$ .

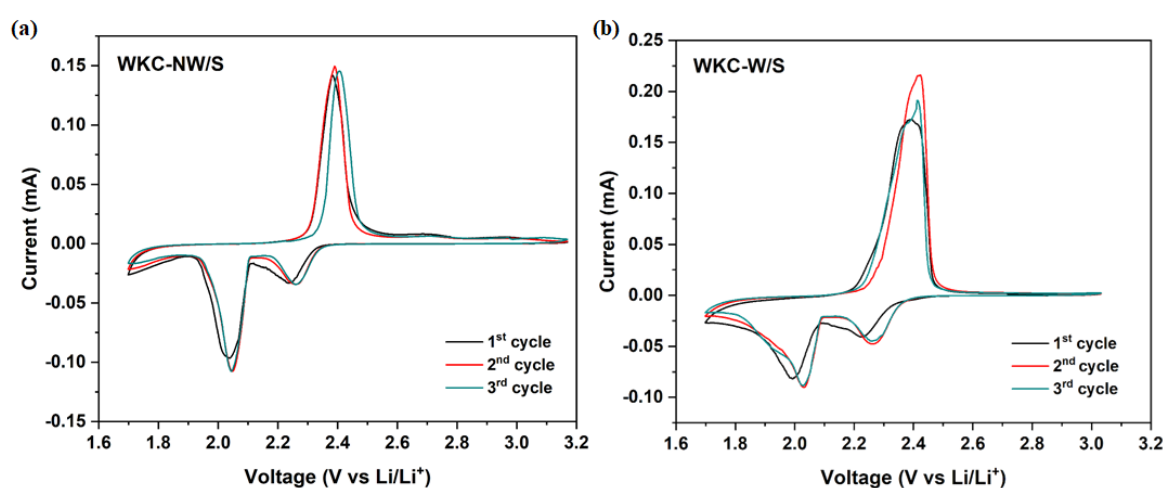

Figure S2. Three consecutive CV curves for WKC-NW/S (a) and WKC-W/S (b).

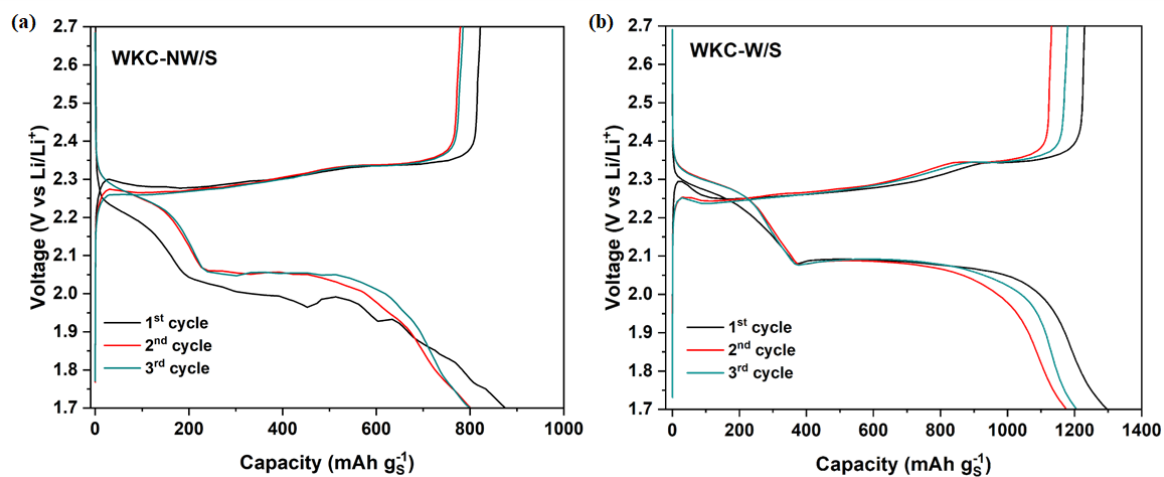

**Figure S3.** Three consecutive GCD profiles for WKC-NW/S (a) and WKC-W/S (b) at 0.1 C.

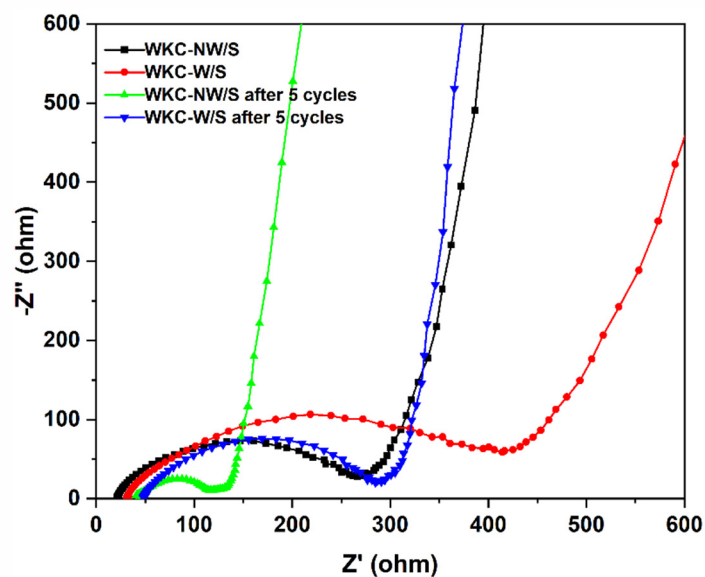

**Figure S4.** EIS spectra for WKC-NW/S and WKC-W/S before and after 5 cycles at 0.1 C.
